### ERRATUM

For the article by Jones *et al.* in the August 2002 issue of ANESTHESIOLOGY (2002; 97:488-96), the correct title should read as follows:

“Variability in the Magnitude of the Cerebral Blood Flow Response and the Shape of the Cerebral Blood Flow-Pressure Autoregulation Curve during Hypotension in Normal Rats”
